# Supplementary material for: Utility of Marine Benthic Associations as a Multivariate Proxy of Paleobathymetry: A Direct Test from Recent Coastal Ecosystems of North Carolina
Source: PLoS One. 2014 Apr 21;9(4):e95711. doi: 10.1371/journal.pone.0095711 (PMC3994079; doi:10.1371/journal.pone.0095711)
Supplement: Table S9 — Filtered dataset with robust mollusks. Species by locality abundance matrix, rows are localities and columns are species. Only robust mollusks have been retained. (CSV) [file pone.0095711.s009.csv]

	64	67	70	78	84	91	96	98	105	108	116	117	119	120	122	123	124	129
3	0	0	0	0	0	0	0	0	1	1	0	10	1	0	0	12	0	26
4	0	0	0	0	5	0	0	0	0	0	0	8	6	0	0	2	0	25
5	0	0	0	0	40	0	0	0	0	0	0	4	21	0	0	0	0	25
8	0	2	0	1	28	0	0	0	0	2	0	4	23	0	0	3	0	54
9	0	0	0	0	8	0	0	0	0	0	0	4	66	0	0	0	2	48
10	0	0	0	0	0	1	0	0	0	14	0	1	16	0	0	0	0	1
11	1	0	0	2	3	19	3	0	1	0	9	8	14	0	0	1	2	28
12	18	64	0	0	4	0	0	0	1	0	0	2	235	0	2	0	2	2
13	0	0	2	0	0	0	7	1	0	1	0	0	0	19	0	0	0	23
14	0	0	10	0	1	27	0	1	0	0	0	2	7	3	0	0	0	4
15	0	0	25	2	5	10	0	0	0	0	0	1	8	3	0	0	0	2
18	0	0	0	0	0	0	0	0	0	0	0	4	10	0	0	1	0	32
19	1	0	0	0	3	0	0	0	0	1	3	0	10	1	0	7	2	21
20	0	0	0	0	2	0	0	0	0	0	0	0	20	0	0	0	0	16
21	0	0	0	0	0	0	32	0	0	0	0	0	0	0	0	0	2	2
22	23	0	3	0	2	1	0	14	0	0	0	1	10	1	7	0	0	22
23	0	0	0	0	0	0	0	0	1	0	0	0	22	1	1	5	2	55
24	7	0	0	0	65	0	0	0	0	1	2	34	198	0	4	0	2	103
25	0	1	0	0	7	0	0	0	1	0	0	2	18	0	0	3	0	13
26	0	1	0	0	1	0	0	0	4	0	0	8	2	0	1	7	0	19
31	0	0	0	0	0	0	0	0	0	0	0	2	2	0	0	11	0	26
32	0	0	0	0	0	0	0	0	1	0	0	4	2	0	0	7	1	36
33	0	0	0	0	1	0	0	0	0	0	0	0	8	0	0	1	1	24
43	0	0	0	0	0	0	0	0	0	3	0	9	0	0	0	23	2	10
45	0	0	0	0	0	0	0	0	3	0	0	5	1	0	0	19	1	5
47	1	0	0	1	0	0	0	0	0	0	0	1	27	0	0	2	0	54
48	0	0	0	0	1	0	0	0	0	0	0	4	7	13	0	3	0	58
49	0	0	0	117	0	1	17	0	0	0	0	1	0	0	0	0	0	1
